# Supplementary material
Source: publisher figshare collection journal article supplement (https://frontiersin.figshare.com/ndownloader/files/12979574)
Supplement: Supplementary file [file 12979574]

Supplementary Table 3.

Phylogenetic assignment and statistics of metagenomic assembly of the Chocolate Pots vent pool water column.

| MAG#             | GC % | MAG size (Mbp) | % Total Reads <sup>c</sup> | Average assembly coverage | % Completeness | % Contamination | % Strain heterogeneity | Consensus Phylogeny                   | Taxonomic rank | % Similarity to 16S amplicon library <sup>d</sup> | % Identity to GenBank <sup>e</sup> |
|------------------|------|----------------|----------------------------|---------------------------|----------------|-----------------|------------------------|---------------------------------------|----------------|---------------------------------------------------|------------------------------------|
| 2                | 43.7 | 1.217          | 0.16                       | 5.53                      | 87.20          | 3.2             | 50                     | <i>Methanobacteriaceae</i>            | Family         | N/A <sup>f</sup>                                  |                                    |
| 3                | 70.8 | 2.374          | 0.67                       | 8.56                      | 96.64          | 2.1             | 0                      | <i>Deferissoma camini</i>             | Species        | 100                                               | 87.0                               |
| 7                | 31.2 | 2.388          | 0.87                       | 15.88                     | 92.90          | 0.55            | 0                      | <i>Ignavibacteriales</i>              | Order          | 100                                               | 85.5                               |
| 9                | 68.1 | 1.955          | 0.22                       | 4.25                      | 56.01          | 6.27            | 0                      | <i>Chthonomonas calidirosea</i>       | Species        | N/A                                               |                                    |
| 11               | 66.3 | 4.226          | 1.11                       | 8.75                      | 97.27          | 3.36            | 0                      | <i>Anaerolinea thermophila</i>        | Species        | 100                                               | 88.4                               |
| 12               | 36.2 | 2.670          | 0.68                       | 9.81                      | 96.72          | 4.37            | 44.44                  | <i>Ignavibacteriales</i>              | Order          | 100                                               | 86.8                               |
| 13               | 68.0 | 1.910          | 0.37                       | 6.23                      | 79.72          | 2.14            | 33.33                  | <i>Thermoanaerobaculum</i>            | Genus          | 100                                               | 99.0                               |
| 14               | 33.3 | 2.007          | 0.48                       | 11.97                     | 98.19          | 0.88            | 0                      | <i>Calditerrivibrio nitroreducens</i> | Species        | N/A                                               |                                    |
| 16               | 38.7 | 2.507          | 3.49                       | 60.66                     | 95.79          | 0.55            | 0                      | <i>Ignavibacteriales</i>              | Order          | 100 <sup>g</sup>                                  | 84.4                               |
| 17               | 60.0 | 2.869          | 1.53                       | 20.17                     | 98.10          | 1.71            | 0                      | <i>Sideroxydans lithotrophicus</i>    | Species        | 100 <sup>g</sup>                                  | 95.2                               |
| 20               | 32.3 | 2.163          | 0.29                       | 6.04                      | 50.68          | 12.93           | 0                      | <i>Ca. Endomicrobium</i>              | Genus          | N/A                                               |                                    |
| 21               | 38.0 | 1.188          | 0.14                       | 5.13                      | 75.62          | 1.7             | 50                     | <i>Planctomycetaceae</i>              | Family         | 98.8                                              | 78.1                               |
| 22               | 49.0 | 3.076          | 10.41                      | 148.08                    | 98.36          | 1.91            | 0                      | <i>Pelodictyon</i>                    | Genus          | 100                                               | 86.3                               |
| 25               | 55.2 | 0.791          | 0.10                       | 4.99                      | 61.41          | 0.56            | 0                      | <i>Ca. Endomicrobium</i>              | Genus          | 100                                               | 84.4                               |
| 31               | 39.2 | 1.234          | 0.18                       | 6.08                      | 60.34          | 7.08            | 0                      | <i>Deinococci</i>                     | Class          | 100                                               | 92.5                               |
| 33               | 63.8 | 2.709          | 1.54                       | 19.42                     | 93.47          | 1.39            | 66.67                  | <i>Methyloversatilis</i>              | Genus          | N/A                                               |                                    |
| 34               | 60.3 | 5.659          | 7.71                       | 59.16                     | 99.69          | 2.36            | 75                     | <i>Roseiflexus</i>                    | Genus          | N/A                                               |                                    |
| 36               | 37.3 | 2.058          | 0.34                       | 7.18                      | 94.91          | 3.36            | 25                     | <i>Deferissoma camini</i>             | Species        | 100                                               | 85.0                               |
| 37               | 69.8 | 2.211          | 0.34                       | 5.60                      | 80.46          | 4.68            | 42.86                  | <i>Dehalococcoides</i>                | Genus          | 99.6                                              | 85.4                               |
| 38               | 30.5 | 2.019          | 0.24                       | 5.15                      | 70.59          | 0               | 0                      | <i>Leptonema illini</i>               | Species        | N/A                                               |                                    |
| 42               | 34.1 | 0.583          | 1.51                       | 120.02                    | 63.92          | 0               | 0                      | <i>Bacteria</i>                       | Kingdom        | 100                                               | 76.8                               |
| 46               | 58.3 | 2.555          | 1.30                       | 20.85                     | 95.45          | 0.91            | 0                      | <i>Anaerolinea thermophila</i>        | Species        | N/A                                               |                                    |
| 49               | 31.8 | 1.419          | 2.04                       | 127.06                    | 82.10          | 3.96            | 12.5                   | <i>Thermococcaceae</i>                | Family         | N/A                                               |                                    |
| 51               | 39.7 | 1.559          | 0.18                       | 5.18                      | 71.13          | 1.04            | 100                    | <i>Thermodesulfovibrio</i>            | Genus          | 100                                               | 85.6                               |
| 52               | 37.7 | 1.328          | 0.23                       | 7.38                      | 92.37          | 0               | 0                      | <i>Caldisericum exile</i>             | Species        | 83.1                                              | 98.3                               |
| 53               | 42.8 | 1.760          | 0.48                       | 11.64                     | 97.27          | 0.91            | 0                      | <i>Thermodesulfovibrio</i>            | Genus          | N/A                                               |                                    |
| 54               | 47.4 | 3.227          | 3.26                       | 49.63                     | 98.91          | 1.91            | 0                      | <i>Chloroherpeton thalassium</i>      | Species        | 100 <sup>g</sup>                                  | 86.6                               |
| 56               | 36.6 | 1.883          | 0.68                       | 15.21                     | 89.33          | 2.25            | 50                     | <i>Ca. Endomicrobium</i>              | Genus          | 100                                               | 80.3                               |
| 59               | 54.9 | 4.124          | 2.64                       | 24.71                     | 87.46          | 4.62            | 33.33                  | <i>Anaerolineaceae</i>                | Family         | 100 <sup>g</sup>                                  | 87.2                               |
| 63               | 29.5 | 0.758          | 0.11                       | 6.08                      | 85.59          | 0.93            | 100                    | <i>Archaea</i>                        | Kingdom        | 82.4                                              | 77.7                               |
| 64               | 48.3 | 2.661          | 12.48                      | 177.95                    | 96.58          | 0.24            | 0                      | <i>Pseudanabaena</i>                  | Genus          | 100 <sup>g</sup>                                  | 90.3                               |
| 67               | 42.0 | 1.986          | 0.70                       | 15.41                     | 95.61          | 23.44           | 52.38                  | <i>Thermodesulfovibrio</i>            | Genus          | N/A                                               |                                    |
| 69               | 58.8 | 2.774          | 0.42                       | 6.82                      | 99.12          | 0               | 0                      | <i>Synechococcus</i>                  | Genus          | N/A                                               |                                    |
| 70               | 34.5 | 0.599          | 0.34                       | 24.44                     | 71.84          | 0               | 0                      | <i>Bacteria</i>                       | Kingdom        | N/A                                               |                                    |
| 73               | 39.5 | 1.557          | 0.96                       | 29.22                     | 93.75          | 0               | 0                      | <i>Ca. Endomicrobium</i>              | Genus          | 100                                               | 83.2                               |
| 74               | 45.9 | 3.179          | 2.14                       | 26.58                     | 97.27          | 6.36            | 25                     | <i>Thermodesulfovibrio</i>            | Genus          | 98.8 <sup>g</sup>                                 | 88.9                               |
| 75               | 56.8 | 1.891          | 0.21                       | 4.78                      | 76.03          | 1.46            | 60                     | <i>Bacteroidetes</i>                  | Phylum         | 100                                               | 80.8                               |
| 77               | 33.0 | 1.875          | 0.27                       | 5.56                      | 65.43          | 1.73            | 50                     | <i>Ignavibacteriales</i>              | Order          | N/A                                               |                                    |
| 78               | 44.7 | 1.767          | 2.47                       | 65.80                     | 94.55          | 0.91            | 0                      | <i>Thermodesulfovibrio</i>            | Genus          | N/A                                               |                                    |
| 79               | 60.9 | 1.152          | 0.11                       | 4.19                      | 54.57          | 0.03            | 100                    | <i>Uliginosibacterium gangwonense</i> | Species        | 100                                               | 95.5                               |
| 80               | 44.8 | 2.417          | 0.30                       | 5.65                      | 91.39          | 0.88            | 33.33                  | <i>Desulfobacteraceae</i>             | Family         | N/A                                               |                                    |
| 81.1             | 29.9 | 0.991          | 10.46                      | 493.44                    | 89.10          | 3.74            | 0                      | <i>Archaea</i>                        | Kingdom        | 100                                               | 76.5                               |
| 81.2             | 31.7 | 0.928          | 21.87                      | 1092.94                   | 73.49          | 1.49            | 0                      | <i>Thermococcaceae</i>                | Family         | 100                                               | 76.6                               |
| sum <sup>a</sup> |      |                | 95.99                      |                           |                |                 |                        |                                       |                |                                                   |                                    |
| avg <sup>b</sup> |      |                |                            | 28.61                     |                |                 |                        |                                       |                |                                                   |                                    |

---

<sup>a</sup> Total percentage of reads mapping to MAGs in the metagenomic assembly

<sup>b</sup> Average read coverage of the contigs in each MAG

<sup>c</sup> Calculated as the percent of reads mapped to a given MAG out of the total number reads for the metagenomic library

<sup>d</sup> Alignment between 16S rRNA gene sequences from the metagenomic assembly and the 16S rRNA gene amplicon library

<sup>e</sup> %Identity of 16S rRNA gene sequences from the metagenomic library aligned to the NCBI GenBank database

<sup>f</sup> Not applicable; no significant alignment to 16S rRNA gene amplicon library, or metagenomic 16S rRNA gene sequence on unbinned contig

<sup>g</sup> >1% OTU read abundance in 16S rRNA gene amplicon library

<sup>a</sup> Total percentage of reads mapping to MAGs in the metagenomic assembly

<sup>b</sup> Average read coverage of the contigs in each MAG
